# Supplementary material for: The antigenic landscape of human influenza N2 neuraminidases from 2009 until 2017
Source: eLife. 2024 May 28;12:RP90782. doi: 10.7554/eLife.90782 (PMC11132685; doi:10.7554/eLife.90782)
Supplement: Figure 1—source data 1. [file elife-90782-fig1-data1.xlsx]

## Sheet: Ferret data
Group	Virus ID	prime	boost*	ferret n°	α-NACHO endpoint titer rep1	α-NACHO endpoint titer rep2
32	ML474	A/Stockholm/32/2014	rNA	1	62500	62500
				2	62500	62500
34	ML476	A/Switzerland/9715293/2013	rNA	1	62500	12500
				2	12500	12500
16	ML455	A/Hong_Kong/4801/2014	rNA	1	62500	12500
				2	12500	62500
27	ML469	A/Paris/2379/2014	rNA	1	2500	62500
				2	62500	12500
38	ML480	A/Texas/50/2012	rNA	1	2500	12500
				2	12500	12500
31	ML473	A/Stockholm/14/2012	rNA	1	62500	62500
				2	62500	62500
36	ML478	A/Tehran/996/2012	rNA	1	12500	62500
				2	12500	62500
40	ML482	A/Victoria/361/2011(Ivr-165)	rNA	1	12500	62500
				2	12500	12500
23	ML465	A/Newcastle/67/2016	rNA	1	62500	2500
				2	62500	12500
7	ML444	A/Estonia/91621/2015	virus	1	2500	2500
				2	2500	12500
3	ML440	A/Ankara/2396/2015(88)	rNA	1	2500	12500
				2	12500	12500
45	ML535	A/Stockholm/15/2014	virus	1	0	2500
				2	0	2500
6	ML443	A/Dakar/14/2014	rNA	1	312500	62500
				2	62500	12500
30	ML472	A/Portoalegre/Lacenrs-2376/2014	rNA	1	2500	62500
				2	62500	62500
39	ML481	A/Utah/11/2011	rNA (15µg)	1	12500	12500
				2	12500	12500
14	ML453	A/Hokkaido/10h079/2011	rNA	1	12500	12500
				2	12500	12500
8	ML445	A/Gambia/G0071436/2012	rNA	1	2500	12500
				2	12500	62500
9	ML446	A/Hanoi/Eli15597/2015	rNA	1	62500	12500
				2	12500	62500
11	ML448	A/Heilongjiang-Xiangyang/1134/2011	rNA	1	2500	12500
				2	12500	12500
41	ML483	A/West_Virginia/17/2012	rNA (15µg)	1	Not tested
				2
28	ML470	A/Perth/16/2009nib-64	rNA (15µg)	1	62500	12500
				2	12500	62500
35	ML477	A/Tasmania/1018/2015	rNA (15µg)	1	12500	12500
				2	62500	62500
22	ML464	A/New_Caledonia/23/2016	rNA	1	12500	12500
				2	12500	12500
2	ML439	A/Alaska/251/2015	rNA	1	2500	62500
				2	12500	12500
10	ML447	A/Hatay/4990/2016(Tr-08)	rNA	1	2500	12500
				2	12500	12500
37	ML479	A/Tennessee/18/2017	rNA	1	0	62500
				2	0	12500
44	ML486	A/Singapore/Infimh-16-0019/2016	rNA	1	2500	62500
				2	12500	62500
4	ML441	A/Brisbane/273/2016	rNA	1	2500	62500
				2	62500	62500
29	ML471	A/Poland/19b/2017	rNA	1	12500	62500
				2	12500	62500
42	ML484	A/Wisconsin/16/2015	rNA	1	12500	62500
				2	12500	2500
18	ML457	A/Indiana/18/2017	rNA	1	2500	312500
				2	62500	12500
15	ML454	A/Hong_Kong/3089/2017	rNA	1	62500	12500
				2	12500	12500
21	ML463	A/Nagano/2153/2017	rNA	1	12500	12500
				2	12500	12500
33	ML475	A/Sweden/3/2017	rNA	1	62500	2500
				2	12500	2500
5	ML442	A/Catalonia/9503s/2017	rNA	1	312500	62500
				2	62500	62500
20	ML462	A/Moramanga/1907/2017	rNA	1	12500	312500
				2	12500	12500
43	ML485	A/Xinjiang-Tianshan/1411/2012	rNA	1	2500	62500
				2	500	12500
12	ML449	A/Helsinki/823/2013	rNA	1	2500	62500
				2	62500	12500
13	ML450	A/Helsinki/941/2013	rNA	1	2500	12500
				2	62500	62500
24	ML466	A/Ohio/13/2017	rNA	1	62500	62500
				2	62500	12500
25	ML467	A/Ohio/62/2012	rNA	1	62500	62500
				2	62500	62500
26	ML468	A/Ontario/Rv3236/2016	rNA	1	12500	62500
				2	62500	12500
17	ML456	A/Indiana/08/2011	rNA	1	62500	62500
				2	12500	62500
19	ML461	A/Minnesota/11/2010	rNA	1	12500	62500
				2	62500	12500

## Sheet: Mouse data
Group	strain	NACHO titer (homologous)	TB (tetHSA)
1	A/Texas/50/2012	24300	2700
2	A/Stockholm/14/2012	72900	8100
3	A/Tehran/996/2012	72900	8100
4	A/Victoria/361/2011	72900	8100
5	A/Stockholm/32/14	8100	2700
6	A/Switz/9715293/2013	24300	8100
7	A/Hong Kong/4801/2014	24300	2700
8	A/Paris/2379/2014	24300	8100
9	A/NewCastle/67/2016	72900	8100
10	A/Estonia/91621/2015	24300	2700
11	A/Stockholm/15/2014	72900	8100
12	A/Dakar/14/2014	24300	8100
15	A/Portalegre/2014	72900	8100
16	A/Utah/11/2011	24300	8100
17	A/Hokkaido/IOH079/2011	24300	8100
18	A/Gambia/2012	24300	8100
19	Hanoi/ELI15597/2015	72900	8100
20	A/HeilongjiangXiangyan/2011	24300	900
21	A/Perth/16/2009	24300	900
22	A/Tasmania/1018/2015	24300	8100
23	A/Hatay/4990/2016	8100	900
24	A/Tennesee/18/2017	8100	900
25	A/Singapure/INFIMH160019/2016	24300	900
26	A/Brisbane/273/2016	2700	900
27	A/Poland/19B/2017	8100	900
28	A/Wisconsin/16/2015	24300	24300
29	A/New Caledonia/23/2016	8100	900
30	Aalaska/251/2016	8100	900
31	A/Indiana/18/2017	8100	900
32	A/HongKong/3089/2017	24300	2700
33	A/Nagano/2153/2017	8100	900
34	A/Sweden/3/2017	24300	2700
35	A/Catalonia/2017	72900	8100
36	Moramang/1907/2017	24300	8100
37	A/XinJiangTianshan	24300	8100
38	A/Helsinki/823/2013	24300	900
39	A/Helsinki/941/2013	24300	900
40	A/Ohio/13/2017	24300	2700
41	A/Ohio/62/2012	24300	900
42	A/Ontario/RV3236/2016	24300	900
43	A/Indiana/08/2011	8100	2700
44	A/Minnesota/11/2010	24300	2700
