# Supplementary material for: The antigenic landscape of human influenza N2 neuraminidases from 2009 until 2017
Source: eLife. 2024 May 28;12:RP90782. doi: 10.7554/eLife.90782 (PMC11132685; doi:10.7554/eLife.90782)
Supplement: Figure 2—source data 1. [file elife-90782-fig2-data1.xlsx]

## Sheet: Ferrets
					Raw data NAI (ELLA using H6N2s)
Group	Virus ID	prime	boost*	ferret n°	A/Texas/50/2012	A/Switzerland/9715293/2013	A/Hong_Kong/4801/2014	A/Minnesota/11/2010	A/Perth/16/2009nib-64	A/Singapore/Infimh-16-0019/2016	A/Victoria/361/2011(Ivr-165)	A/Ontario/Rv3236/2016	A/Helsinki/823/2013	A/Indiana/08/2011	A/Ohio/13/2017	A/Kansas/14/2017	A/Wisconsin/16/2015	A/Ohio/62/2012	A/Moramanga/1907/2017	A/Helsinki/941/2013	A/Estonia/91621/2015	A/Heilongjiang-Xiangyang/1134/2011	A/Tasmania/1018/2015	A/Utah/11/2011	A/Sweden/3/2017	A/Nagano/2153/2017	A/Hong_Kong/3089/2017	A/Newcastle/67/2016	A/Gambia/G0071436/2012	A/Alaska/251/2015	A/Hanoi/Eli15597/2015
32	ML474	A/Stockholm/32/2014	rNA	1	7110.62	9095.34	13115.9	781.2	4338.74	1876.37	1735.89	920.493	507.795	208.619	1739.84	2028.33	495.646	4261.41	1606.33	2517.37	16022.8	804.918	4748.08	826.637	1059.81	1329.61	1714.38	3139.92	9351.19	1392.94	2039.78
				2	13707.9	21990.7	21310.2	489.396	5012.66	2950.4	1416.8	461.014	181.11	22.771	786.61	10289.1	270.094	2534.71	1642.6	1722.91	10239.7	2774.48	2749	1971.91	1210.69	2415.94	3115.12	5956.6	7571.26	5978.14	9352.04
34	ML476	A/Switzerland/9715293/2013	rNA	1	13091.5	11454	4839.3	438.882	2340.64	1682.03	3076.47	573.936	236.752	370.258	682.336	2183.88	1149.08	1777.58	656.33	660.464	8274.39	2051.06	2379.86	1480.6	516.706	345.243	1659.88	1478.51	4781	2320.96	7661.67
				2	7511.83	7212.11	8827.7	166.072	1458.65	901.22	1808.13	135.075	83.6254	84.7646	163.307	966.696	730.213	367.419	263.925	752.275	2786.39	970.751	919.893	1440.64	513.154	75.6901	535.737	1500.99	2198.75	1303.54	2846
16	ML455	A/Hong_Kong/4801/2014	rNA	1	13325.9	8100.77	10950.8	113.182	2092.43	406.868	2008.18	111.172	76.8835	24.836	198.594	2473.76	303.464	99.571	63.595	162.974	12737.6	1359.36	2298.57	3001.65	96.1338	27.1231	613.531	1113.06	3595.9	3158.75	1893.11
				2	16640.1	6954.25	10182	501.214	2953.45	866.13	3109.94	133.246	34.139	161.978	244.149	4423.16	1257.98	186.505	399.891	296.759	3151.48	2583.05	5385.83	4179	261.011	34.4718	2010.7	8045.72	10534.1	6802.98	7703.46
27	ML469	A/Paris/2379/2014	rNA	1	23632.3	16285.3	29377.3	2451.83	2519.02	804.02	2696.55	1881.48	403.203	1564.32	1795.36	2781.1	908.226	1734.34	286.646	849.857	8028.08	2116.27	2731.52	5004.03	1241.75	10	1436.22	3991.09	2996.24	3629.9	2510.65
				2	15038.5	7466.54	23943.9	515.792	1744.3	1867.03	2246.93	1112.54	1559.62	170.119	767.308	1567.55	1394.97	1656.7	1152	1748.73	8556.55	1583.84	3968.67	4981.41	2027.58	74.0095	1818.66	2523.46	2867.49	2149.05	2777.55
38	ML480	A/Texas/50/2012	rNA	1	8860.74	7342.83	10544.2	136.406	2823.11	330.654	1903.26	615.581	32.3163	21.981	94.1736	581.798	249.16	446.489	245.314	347.734	6343.85	1106.19	1045.35	807.474	54.0633	10	298.775	360.575	2555.08	1693.44	1841.55
				2	8826.22	14159.7	10251.1	162.711	2189.98	542.866	2275.94	349.159	74.1789	10	51.8745	461.551	863.358	143.532	331.685	965.16	1298.1	1119.59	626.181	996.629	430.92	24.4355	626.535	1121.2	483.207	1288.07	1064.55
31	ML473	A/Stockholm/14/2012	rNA	1	24603.9	29977.7	27301.5	416.666	11933	2072.48	3759.78	260.235	363.801	92.6534	441.019	2397.37	3990.05	543.976	1419.2	2114.54	24714.5	18195	1138.18	4718.24	1016.85	58.8775	2783.5	4499.53	2294.44	5485.07	3159.83
				2	25175.2	20918.4	26323	2258.21	12928.3	1995.27	6068.24	1256.93	206.338	1499.63	785.924	5056.47	1652.28	5046.23	743.298	1913.83	9058.34	7747.08	4217.06	9214.23	479.209	111.167	3097.54	5165.18	3591.72	3805.31	5507.62
36	ML478	A/Tehran/996/2012	rNA	1	24111	21339.9	20033.9	517.679	15742	1434.47	12573.5	399.846	874.839	263.227	1091.63	3343.48	4517.37	1383.27	1860.9	1767.72	5706.48	5929.3	3287.47	7384.51	3376.17	117.456	1287.35	7185.91	5886.76	9153.12	13175.7
				2	15232.7	15319.7	11812.1	374.617	4288.59	349.575	3590.77	679.066	245.372	135.459	581.762	1650.22	2874.79	1377.4	412.726	817.673	2709	3737.92	2505.48	6557.32	986.257	174.796	207.906	2750.34	4396.6	3507.97	3555.24
40	ML482	A/Victoria/361/2011(Ivr-165)	rNA	1	13915.1	17715.8	8423.16	137.075	3424.46	431.693	3966.71	423.572	50.0351	70.1895	230.135	2310.75	2535.72	424.772	234.538	829.564	5376.97	1532.2	364.143	3703.65	364.404	79.0619	1392.89	1620.64	995.127	2193.81	3028.01
				2	9868.92	15893.6	14713.5	649.139	2352.95	704.671	3760.67	1163.95	108.615	180.642	350.154	4388.89	1226.45	697.25	580.852	1576.45	1583.78	1226.03	1402	796.402	223.195	137.992	1061.81	2117.23	346.703	869.899	4898.62
23	ML465	A/Newcastle/67/2016	rNA	1	6425.96	7665.14	7296.49	3181.45	1910.83	51.4358	1198.12	2124.61	166.354	10	1728.97	365.73	127.486	2975.68	10	131.355	2693.8	1684.18	1526.5	5751.92	10	10	112.7	5783.15	692.55	1121.84	1842.27
				2	4062.03	7629.2	12108.7	57.4554	697.204	333.746	915.755	55.0736	247.21	10	58.5098	526.463	365.225	130.234	241.137	387.687	1897.96	824.496	979.698	5202.06	131.54	26.509	709.92	2654.51	949.891	921.277	1189.57
7	ML444	A/Estonia/91621/2015	virus	1	445.64	740.767	932.119	10	98.9248	47.1188	148.908	42.6795	10	40.8559	109.084	550.057	59.5961	32.2048	10	25.8541	388.518	83.8676	210.595	55.1544	41.6549	10	47.0287	253.189	193.175	56.8327	124.255
				2	1376.5	1813.48	1826.85	157.149	287.664	220.153	625.357	178.601	215.168	36.4728	83.2725	2239.85	215.327	504.553	10	126.836	5277.19	461.078	223.826	500.702	115.364	10	457.278	327.725	477.501	85.0641	326.858
3	ML440	A/Ankara/2396/2015(88)	rNA	1	3140.34	4077.38	4901.89	127.29	507.145	135.266	837.893	258.316	31.1663	137.705	86.1069	643.27	326.614	184.379	30.7819	114.862	7772.92	468.348	1007.12	840.905	65.3639	10	272.238	787.329	506.527	129.501	417.632
				2	834.845	2491.5	2958.83	176.976	275.932	150.577	303.176	128.339	35.885	88.8121	43.5345	929.889	180.545	106.385	54.4308	68.0194	3869.85	301.005	987.004	340.764	255.499	30.2821	309.801	585.592	208.633	123.205	306.861
45	ML535	A/Stockholm/15/2014	virus	1	638.464	712.734	644.973	121.153	205.43	105.668	756.056	292.406	10	30.2482	199.096	851.658	338.307	667.202	83.3646	103.24	676.534	110.396	21.7976	365.146	10	10	219.119	254.342	256.153	91.833	413.791
				2	692.852	806.03	569.35	10	176.056	54.3122	744.418	28.4638	10	10	10	1056.6	83.4449	190.546	93.8088	121.137	71.5033	317.165	55.8535	166.651	10	10	20.3085	91.4028	226.83	124.148	224.404
6	ML443	A/Dakar/14/2014	rNA	1	31851.3	19441.2	23746.7	1314.5	9688.21	298.323	7474.7	12854.5	1498.7	963.764	880.233	1743.99	364.059	1953.12	151.098	1520.73	19402.9	8338.38	8447.55	15052.3	242.255	74.2413	645.069	2772.83	3403.13	1608.07	1909.14
				2	9640.47	5366.84	10097.2	217.399	1416.07	616.815	2433.94	291.325	469.04	204.369	175.621	5247.36	520.404	184.89	389.522	472.579	3317.92	1331.95	1482.91	1905.6	292.27	27.1479	915.796	504.144	439.617	294.244	281.228
30	ML472	A/Portoalegre/Lacenrs-2376/2014	rNA	1	8718.79	16828.7	5036.03	87.0082	2741.48	315.869	1807.25	124.247	69.0899	10	248.407	1585.02	133.615	188.928	126.519	340.911	1198.41	1561.12	616.462	4609.7	132.547	53.9842	304.514	640.717	1099.35	1377.98	1476.59
				2	23920.4	26368.9	26157.9	403.248	7260.18	1066.21	5253.39	326.068	398.057	25.9819	664.348	1114.88	1395.46	933.606	456.508	1707.94	4605.38	7099.07	627.791	2515.3	326.779	337.758	1145.45	2246.17	4502.31	2113.54	3004.81
39	ML481	A/Utah/11/2011	rNA (15µg)	1	7640.56	7007.66	7321.94	797.011	2309.16	391.259	4266.15	1023.26	132.633	458.297	272.318	1312.84	1211.24	1117.23	479.859	529.368	5211.5	5074.65	400.234	3426.04	267.008	72.8025	376.18	2166.01	1522.94	996.027	3518.64
				2	4865.85	5235.97	5860.9	136.424	2084.17	33.6255	2518.79	822.406	68.2329	21.8023	145.579	365.014	294.674	1376.25	51.0744	568.821	2243.59	3026.68	351.727	2361.36	10	10	55.6925	974.052	1066.41	742.324	1474.01
14	ML453	A/Hokkaido/10h079/2011	rNA	1	7243.15	5406.61	6773.55	262.481	1456.02	313.687	2260.82	89.527	125.488	10	39.1381	2860.77	771.643	73.0784	35.2316	204.633	6924.35	2025.64	360.304	1390.54	304.232	10	183.928	1030.48	951.547	1670.04	904.919
				2	2893.84	2636.47	2056.65	300.525	840.384	155.015	919.347	197.2	149.736	91.0966	155.858	219.68	159.719	169.772	32.9886	109.007	1613.33	566.245	231.584	914.351	73.1337	10	73.0389	224.589	224.683	402.544	294.98
8	ML445	A/Gambia/G0071436/2012	rNA	1	7799.88	7126.2	6486.02	601.119	1962.34	697.63	1981.57	355.359	527.312	277.969	211.95	2066.63	873.239	148.431	158.622	496.544	6577.91	2599.36	760.809	1049.58	309.722	45.2861	1139.93	1858.08	738.101	1170.09	989.863
				2	2280.17	3901.28	5898.05	817.415	836.462	84.034	471.348	491.562	66.527	37.6838	255.395	1309.76	191.41	160.284	119.807	444.168	6107.83	1021.02	913.073	496.259	39.408	29.4114	249.593	1126.61	722.388	605.885	737.186
9	ML446	A/Hanoi/Eli15597/2015	rNA	1	6493.87	3005.32	9624.43	657.934	1207.35	191.447	765.825	749.92	315.867	1690.8	1057.28	824.661	500.202	84.762	78.703	167.582	4996.79	2944.75	1080.03	682.634	128.118	145.104	664.604	1681.72	1949.28	2117.87	1744.71
				2	5970.24	6265.06	6676.5	680.498	1129.19	260.432	979.614	363.082	117.197	720.888	173.201	450.044	759.479	329.471	270.163	251.404	9387.76	995.124	1533.9	1364.26	508.35	160.188	520.744	1552.24	737.28	2648.91	1899.26
11	ML448	A/Heilongjiang-Xiangyang/1134/2011	rNA	1	4497.25	4149.54	4095.58	44.8587	1400.42	102.613	1014.98	35.5467	276.992	28.0903	309.5	897.258	348.305	571.974	45.9769	98.899	1318.98	6674.76	117.405	1525.76	107.452	10	95.0112	278.838	182.308	742.809	551.573
				2	5748.7	2863.07	2864.86	209.592	2713.04	57.2523	6013.61	105.711	673.354	68.2022	163.841	1494.1	166.242	2088.5	23.7973	53.097	634.355	7514.76	219.142	1788.38	46.821	10	35.1924	433.216	309.491	573.706	564.307
41	ML483	A/West_Virginia/17/2012	rNA (15µg)	1	261.511	381.937	409.907	10	52.027	10	121.093	10	45.8931	10	10	176.538	34.8375	170.684	10	1132.32	36.9122	109.922	10	23.1163	10	10	10	46.3462	43.5975	70.5465	70.007
				2	629.869	898.064	1072.59	10	266.547	10	637.22	10	234.419	10	52.9079	218.502	152.036	380.899	56.0566	3098.41	111.585	291.26	65.585	582.948	42.0458	10	146.206	122.911	137.093	257.199	253.316
28	ML470	A/Perth/16/2009nib-64	rNA (15µg)	1	12930.8	7443.55	24190.5	132.556	3712.19	424.965	4593.67	77.751	923.653	139.64	267.492	576.421	903.387	625.247	109.549	838.545	5823.87	2061.36	407.606	1303.29	135.101	10	147.943	803.156	627.992	1028.13	530.977
				2	3274.66	2480.07	3553.44	189.696	1204.69	101.274	948.763	84.7067	181.423	87.5319	232.945	241.463	167.518	211.123	97.8111	200.664	1181.09	1266.25	429.102	3985.68	69.8098	10	351.665	457.397	1530.93	468.531	352.215
35	ML477	A/Tasmania/1018/2015	rNA (15µg)	1	3731.37	2198.3	2451.43	324.397	1821.96	482.094	1184.31	250.873	243.168	330.771	169.214	1791.66	124.48	463.42	386.079	873.711	1977.64	610.648	935.205	851.556	436.457	172.657	786.889	1132.62	2013.65	502.148	1363.82
				2	6677.74	10808.9	13337	1055.48	3496.49	947.063	1411.86	1387.39	482.941	596.838	645.552	2008.45	560.168	4940.89	716.323	2006.99	3877.79	807.518	1365.79	1846.73	206.545	184.9	1512.75	3537.91	10889.6	1452.5	3384.6
22	ML464	A/New_Caledonia/23/2016	rNA	1	7462.04	9245.29	12934.2	55.2646	1716.27	543.54	936.579	85.0006	166.473	1948.82	49.8286	2508.38	787.709	69.0233	368.97	330.528	4523.7	1043.15	1503.19	3163.16	780.092	365.958	2454.19	1287.07	1146.53	3457.21	1112.69
				2	5327.72	3354.7	8529.78	97.2357	802.367	566.938	581.363	57.701	130.116	10	54.2545	3321.82	686.872	113.611	122.055	297.199	2086.43	606.952	578.359	1804.95	471.057	81.9064	1566.2	415.132	547.632	1621.16	793.414
2	ML439	A/Alaska/251/2015	rNA	1	8953.45	8861.11	12688.5	34.8256	1373.93	980.914	1523.88	91.1142	213.431	10	23.0037	3877.22	1853.59	54.1107	522.711	811.453	9697.97	2035.98	3851.52	2806.94	1234.61	747.073	747.478	1687.22	525.091	4027.18	1396.07
				2	5596.06	5722.35	3744.48	10	911.427	330.379	971.228	85.0089	10	10	10	2349.24	205.923	91.4124	270.319	126.3	5193.83	1620.95	749.264	1143.26	294.354	155.612	411.057	413.646	172.203	2809.08	744.301
10	ML447	A/Hatay/4990/2016(Tr-08)	rNA	1	4764.42	10182.1	5314.5	473.958	318.178	4565.23	3866.3	31.5308	660.918	19.6889	50.8612	17433.6	3199.41	32.4149	1123.43	681.484	3475.04	404.075	3981.88	739.645	6773.84	2085.45	12970.9	3090.5	166.099	2142	1431.09
				2	661.593	443.649	1376.49	10	200.288	1161.47	485.914	68.221	326.453	10	10	1790.63	146.967	10	434.837	407.784	2263.07	199.946	371.305	223.957	981.536	851.354	3209.81	68.2012	53.782	761.249	352.565
37	ML479	A/Tennessee/18/2017	rNA	1	851.152	1246.97	1387.83	10	178.472	1969.99	1207.59	390.164	31.4123	10	211.953	1115.38	334.556	1065.89	3033.39	331.353	301.432	165.149	640.69	231.348	1957.23	326.301	4544.91	245.657	290.214	634.346	404.288
				2	1320.11	1811.04	1259.98	48.9829	294.409	3348.76	662.576	43.4802	76.6335	10	60.166	1314.99	416.416	88.8916	3459.97	2156.9	751.878	139.778	271.21	110.932	3209.98	203.72	2481.84	852.068	1117.77	929.012	116.624
44	ML486	A/Singapore/Infimh-16-0019/2016	rNA	1	4156.75	1742.85	6100.25	20.0388	278.619	3872.52	1100.17	10	201.119	10	36.3935	2087.66	1212.5	260.979	2161.81	2481.6	672.53	139.552	679.707	597.366	1675.54	463.584	3439.66	861.776	276.656	778.437	687.496
				2	2255.84	3386.08	1639.46	224.526	377.495	3619.93	1138.2	126.013	102.306	10	152.721	2304.44	2332.8	304.154	354.584	1765.05	792.815	253.457	119.538	492.942	1599.54	2317.54	10982.1	1215.3	227.981	778.332	1929.94
4	ML441	A/Brisbane/273/2016	rNA	1	2321.11	2827.35	4464.88	153.019	461.86	2966	863.577	200.099	1883.9	10	57.6216	10348.1	2512.29	163.02	1993.67	685.893	4574.39	513.478	945.705	476.904	4598.25	2253.65	5361.77	378.705	314.194	1721.76	497.361
				2	4113.7	4015.25	9378.95	91.2194	482.314	2600.45	677.859	92.1362	1317.27	10	178.457	7836	1322.27	375.952	1610.39	729.515	7711.78	559.355	1209.83	309.568	3007.88	1492.1	8129.85	719.071	187.201	2087.96	574.039
29	ML471	A/Poland/19b/2017	rNA	1	1826.05	1064.41	1612.57	22.1519	614.545	664.351	1267.1	23.2857	34.471	10	10	1911.8	115.368	70.4046	197.686	324.024	323.719	405.879	239.519	1367.65	323.203	90.8632	876.674	714.731	552.969	363.069	439.378
				2	944.767	467.037	963.848	10	195.092	1315.99	492.589	10	10	10	10	4928.76	252.843	10	292.664	270.691	337.71	119.405	184.634	959.683	407.484	233.908	1491.87	1232.83	286.08	298.587	202.454
42	ML484	A/Wisconsin/16/2015	rNA	1	4650.35	7114.52	8002.01	10	450.663	1132.22	668.379	10	10	10	21.6112	4692.56	10158.1	63.5796	542.709	191.971	2009.72	363.833	621.983	548.007	1249.93	575.005	1131.9	1401.92	77.9859	1109.29	798.733
				2	1526.76	5201.07	4497.41	10	380.227	411.87	718.466	10	10	10	10	339.091	1542.62	85.8984	297.503	76.4735	508.421	361.492	263.652	219.246	111.468	171.894	224.243	594.4	68.1905	337.729	392.623
18	ML457	A/Indiana/18/2017	rNA	1	285.732	260.263	299.36	10	20.9156	615.744	114.229	34.4439	55.5628	10	10	1128.48	95.6415	35.167	627.985	23.3587	219.497	10	174.901	27.5037	479.981	333.001	1034.58	137.221	52.5809	365.611	95.0734
				2	564.383	661.25	1129.04	10	90.5629	646.192	87.4666	22.1037	126.093	10	10	2132.66	89.1538	40.9574	424.161	116.891	376.158	68.663	293.847	105.008	639.839	276.372	1116.78	165.794	63.1479	379.824	264.938
15	ML454	A/Hong_Kong/3089/2017	rNA	1	1867.29	1417.15	1173.9	10	143.571	2471.32	635.134	10	534.49	10	10	1778.29	1230.77	10	1237.09	525.217	969.689	259.754	497.926	360.782	3815.81	1314.84	7038.4	513.775	224.546	1086.41	273.622
				2	713.701	10	1571.2	10	32.7575	597.646	148.509	10	60.1821	10	10	1608.79	186.564	10	252.366	124.661	372.128	26.939	137.171	101.175	412.875	210.856	1200.06	111.03	64.5787	319.477	49.3236
21	ML463	A/Nagano/2153/2017	rNA	1	574.841	915.792	713.295	88.6594	99.8884	562.194	125.883	10	93.5893	10	161.234	5406.39	264.098	263.698	372.773	153.408	674.881	154.325	178.183	173.771	266.183	1065.9	969.742	321.995	55.3775	486.747	188.879
				2	560.303	653.501	884.331	20.5209	117.568	440.508	79.3759	10	94.9862	10	10	3452.03	49.8303	10	253.681	78.3491	385.282	136.171	166.552	143.324	250.945	855.746	1293.74	108.977	139.63	178.86	176.793
33	ML475	A/Sweden/3/2017	rNA	1	3373.16	3387.57	1482.88	43.6748	571.91	6544.94	2787.14	331.214	560.235	10	221.595	4608.83	1765.47	241.105	4935.59	1727.33	663.199	385.629	964.283	610.736	12132	887.03	8838.18	1215.63	900.078	3066.51	5501.61
				2	2004.12	1113.56	1016.32	73.4197	452.006	4127.54	849.668	316.58	452.516	44.3556	44.3782	11740.4	569.543	157.883	4254.65	2893	223.434	720.869	857.085	653.625	4772.05	1378.11	5361.51	354.773	552.108	1240.71	1186.97
5	ML442	A/Catalonia/9503s/2017	rNA	1	1724.54	1979.47	1985.25	10	290.901	1817.41	461.326	177.733	135.62	10	10	4104.56	427.993	161.54	2153.3	372.511	3900.45	350.155	537.37	309.805	1506.62	145.01	2414.75	197.951	201.643	1114.44	468.369
				2	3248.69	2364.66	5436.99	44.4672	363.568	1889.72	661.54	235.405	327.575	10	32.8027	7031.33	316.96	281.079	2284.65	421.648	865.365	344.808	723.493	431.531	3221.17	581.44	5901.74	309.98	239.336	1630.8	359.383
20	ML462	A/Moramanga/1907/2017	rNA	1	1100.58	1845.67	1923.05	130.831	277.939	1641.56	339.796	183.419	106.075	10	85.9351	2620.7	428.982	165.751	11374.7	210.314	1763.03	364.538	644.992	520.353	2077.01	484.657	4910.63	270.247	371.335	899.013	550.951
				2	341.002	407.53	818.971	10	124.065	479.55	70.7778	10	45.0719	10	28.615	1804.76	116.921	46.2524	1286.84	76.0153	384.474	91.5605	147.242	158.006	495.051	33.1153	1156.64	101.521	53.6124	308.328	120.186
43	ML485	A/Xinjiang-Tianshan/1411/2012	rNA	1	4355.58	3836.35	2867.11	91.3874	1920.43	222.472	651.773	164.156	173.882	15.965	43.5885	520.443	47.3195	86.9573	152.36	1128.6	649.448	493.834	717.302	1630.6	26.6108	28.426	43.7557	415.292	842.779	790.116	677.63
				2	1305.76	491.05	602.235	28.8334	381.318	234.443	516.673	10	10	10	10	84.4837	10	20.6363	10	157.67	242.328	104.982	124.117	300.392	31.7361	10	67.3017	57.5727	303.195	170.19	62.7967
12	ML449	A/Helsinki/823/2013	rNA	1	1273.56	1029.47	926.686	42.8802	249.76	723.38	709.61	127.749	5330.84	54.7935	33.4979	7375.88	241.24	150.704	160.979	13165.3	2949.79	398.976	97.5711	380.294	435.147	10	860.571	79.6251	96.4276	115.488	139.223
				2	1492.21	1231.37	1890.11	50.6694	329.027	315.163	273.987	43.2229	6535.9	10	32.7134	5305.69	190.657	25.0823	65.2667	10732.7	911.919	463.811	82.4758	267.639	218.391	10	629.698	74.5305	185.822	98.2366	128.019
13	ML450	A/Helsinki/941/2013	rNA	1	265.6	130.282	212.381	10	10	60.4439	40.7009	10	2934.2	10	10	729.715	10	35.0892	10	14106.7	121.278	25.7771	10	68.0816	40.2582	10	71.8937	10	10	10	10
				2	1058.71	651.967	546.981	10	212.116	454.074	650.035	10	4524.64	10	24.6403	3421.7	148.914	93.1001	10	21525.7	1552.8	119.389	37.4001	386.373	265.726	10	240.611	28.4846	55.3583	107.763	41.4032
24	ML466	A/Ohio/13/2017	rNA	1	539.003	509.458	713.99	6114.59	249.098	47.7237	218.878	5302.2	303.188	840.955	2802.23	278.043	10	29989.7	10	208.504	486.306	184.873	124.54	257.036	10	10	10	103.284	141.497	10	101.598
				2	461.376	283.74	395.29	3772.33	190.599	10	275.826	4336.48	139.289	721.33	2333.49	279.764	10	27376.3	10	67.2571	269.481	151.987	35.6495	113.106	10	10	10	10	82.547	10	48.8685
25	ML467	A/Ohio/62/2012	rNA	1	782.769	514.401	637.995	908.096	164.435	10	270.247	487.272	123.773	361.287	6925.19	279.447	10	5135.37	10	115.777	1434.93	128.129	138.839	340.254	10	10	10	56.1825	48.0753	35.0533	121.3
				2	605.226	376.951	651.023	934.759	140.723	10	43.6817	306.901	30.343	200.961	4258.77	21.4004	10	2486.67	10	24.4296	614.257	68.9277	34.9958	75.5006	10	10	10	10	27.725	10	34.5212
26	ML468	A/Ontario/Rv3236/2016	rNA	1	99.6324	44.2937	55.6051	882.595	37.7124	10	87.5278	5091.22	22.393	181.463	253.969	563.448	10	1233.07	10	10	38.5185	10	37.3932	10	10	10	10	10	10	10	28.4951
				2	103.709	63.7745	142.838	809.897	36.072	10	348.44	7243.95	22.4655	137.107	135.662	832.61	10	1767.93	10	32.5612	64.789	10	44.9012	77.5182	10	10	10	10	10	10	10
17	ML456	A/Indiana/08/2011	rNA	1	168.548	44.4356	111.705	3976.18	62.7976	10	251.41	649.627	10	3341.76	162.398	165.872	10	7002.33	10	10	41.0967	71.1539	10	83.5012	10	10	10	34.7922	52.7251	10	10
				2	52.182	24.2746	33.2188	1020.49	10	10	103.167	323.885	24.8586	2479.99	130.314	366.851	10	481.209	10	22.0944	45.1936	10	10	10	10	10	10	10	10	10	10
19	ML461	A/Minnesota/11/2010	rNA	1	52.348	27.4738	66.4648	5271.24	10	10	24.9522	884.453	85.7365	485.73	194.753	172.139	10	448.826	10	24.6269	10	26.0614	10	10	10	10	10	10	10	10	10
				2	130.836	91.3375	226.962	3479.9	51.6163	10	10	568.79	24.1987	274.645	209.775	20.2772	10	569.37	10	10	77.979	56.2263	10	67.9412	10	10	10	22.8138	10	10	10
