# Supplementary material for: The antigenic landscape of human influenza N2 neuraminidases from 2009 until 2017
Source: eLife. 2024 May 28;12:RP90782. doi: 10.7554/eLife.90782 (PMC11132685; doi:10.7554/eLife.90782)
Supplement: Figure 2—source data 2. [file elife-90782-fig2-data2.xlsx]

## Sheet: Mouse
group	strain	A/Texas/50/2012 H6N2	A/Switzerland/9715293/2013 H6N2	A/HongKong/4801/ H6N2	A/Helsinki/823/2013 H6N2	A/Indiana/08/2011 H6N2	A/Kansas/14/2017 H6N2	A/Perth/16/2009 H6N2
1	A/Texas/50/2012	8796.15	17187.3	19052.9	195.946	240.609	218.406	3581.23
2	A/Stockholm/14/2012	50607.3	60147.1	81799.8	349.074	985.615	255.027	36769
3	A/Tehran/996/2012	39560.7	80236.3	50141.6	645.152	3279.15	252.92	3030.45
4	A/Victoria/361/2011	19932.4	28106.5	32280.8	292.12	140.696	364.987	9765.75
5	A/Stockholm/32/14	1967.68	4251.07	6707.45	215.935	2593.71	136.825	676.619
6	A/Switz/9715293/2013	8793.5	23315.2	18359.2	188.067	586.349	91.3138	2181.94
7	A/Hong Kong/4801/2014	8061.91	22036.7	23636	115.897	340.356	85.109	2602.91
8	A/Paris/2379/2014	35978.7	47315.2	52900.2	290.109	1224.18	544.013	12505.8
9	A/NewCastle/67/2016	20867.5	50233.6	33708.2	1006.69	6331.45	879.244	7224.01
10	A/Estonia/91621/2015	3415.53	5684.74	9406.82	39.8014	139.194	40.1082	1221.84
11	A/Stockholm/15/2014	27992.8	55625.6	49503.6	603.85	3255.88	488.574	14618.2
12	A/Dakar/14/2014	3932.57	3256.72	4548.85	13.2768	23.2664	91.7082	1364.26
15	A/Portalegre/2014	27208.5	57387.1	60387.3	216.48	628.421	370.126	15599.6
16	A/Utah/11/2011	26613	82802.3	39270	471.485	2115.67	640.815	25366.4
17	A/Hokkaido/IOH079/2011	11271.5	22286.4	20727.3	183.766	763.267	272.108	3436.83
18	A/Gambia/2012	8298.67	17626.4	19882.3	191.908	347.79	347.945	2539.41
19	Hanoi/ELI15597/2015	21277.5	49314.1	48018.4	253.18	1009.9	138.235	14906.8
20	A/HeilongjiangXiangyan/2011	1606.94	2143.62	2537.65	28.4295	10	97.0998	4221.48
21	A/Perth/16/2009	7201.6	10610.5	15359	91.8371	10	93.7333	7323.94
22	A/Tasmania/1018/2015	5528.4	7171.76	10649	360.346	4356.43	265.383	2443.25
23	A/Hatay/4990/2016	647.941	1379.05	1936.95	72.1555	10	897.651	342.926
24	A/Tennesee/18/2017	403.465	916.336	776.763	89.8277	10	1143.48	181.283
25	A/Singapure/INFIMH160019/2016	2633.75	4559.62	5966.92	63.9543	10	426.533	352.984
26	A/Brisbane/273/2016	431.456	596.574	586.643	66.8871	10	925.775	266.171
27	A/Poland/19B/2017	716.5	1302.1	1773.73	43.1622	10	341.917	479.062
28	A/Wisconsin/16/2015	14375.8	92052.8	67258.8	31.43	10	21.6262	5534.98
29	A/New Caledonia/23/2016	2722.65	6093.11	7901.24	26.7033	10	182.919	778.494
30	Aalaska/251/2016	4210.51	8335.96	13044.8	256.885	505.322	79.257	1556.79
31	A/Indiana/18/2017	170.763	292.839	400.329	13.4221	10	125.015	18.2123
32	A/HongKong/3089/2017	4555.3	8349.2	10246.2	204.64	93.802	769.443	1211.14
33	A/Nagano/2153/2017	147.501	278.823	364.593	10	10	16.3368	18.7161
34	A/Sweden/3/2017	4079.75	8676.78	12822.8	182.571	19.0247	2409.35	3123.5
35	A/Catalonia/2017	657.096	592.765	657.167	322	10	1536.44	211.251
36	Moramang/1907/2017	533.731	994.153	1052.16	106.5	10	440.69	172.14
37	A/XinJiangTianshan	307.757	413.131	501.401	15.8276	10	88.9094	85.6101
38	A/Helsinki/823/2013	32.3104	44.5259	66.877	740.443	10	12.1645	8.26009
39	A/Helsinki/941/2013	281.632	455.893	512.807	1075.28	33.6711	47.1774	78.2428
40	A/Ohio/13/2017	224.406	236.937	288.229	24.7862	1625.51	10	595.973
41	A/Ohio/62/2012	170.145	272.423	287.828	58.9961	664.865	10	227.307
42	A/Ontario/RV3236/2016	62.8879	33.7099	37.5702	91.8371	249.19	10	10.8121
43	A/Indiana/08/2011	33.9611	32.7705	36.6124	14.2993	2487.6	10	18.1617
44	A/Minnesota/11/2010	242.289	153.443	227.618	80.3288	1389.89	10	55.0384
